# Supplementary material for: Ecological Niche Modeling of Seventeen Sandflies Species (Diptera, Psychodidae, Phlebotominae) from Venezuela
Source: Hindawi journal article supplement (doi:10.1155/2015/108306), 2015-01-01

**Supplementary material**: Omission and predicted area and Jackknife regularized trained gain figures, for each *Lutzomyia* species: (1,2) *L. antunesi*, (3,4) *L. atroclavata*, (5,6) *L. c. cayennensis*, and (7,8) *L. dubitans.*


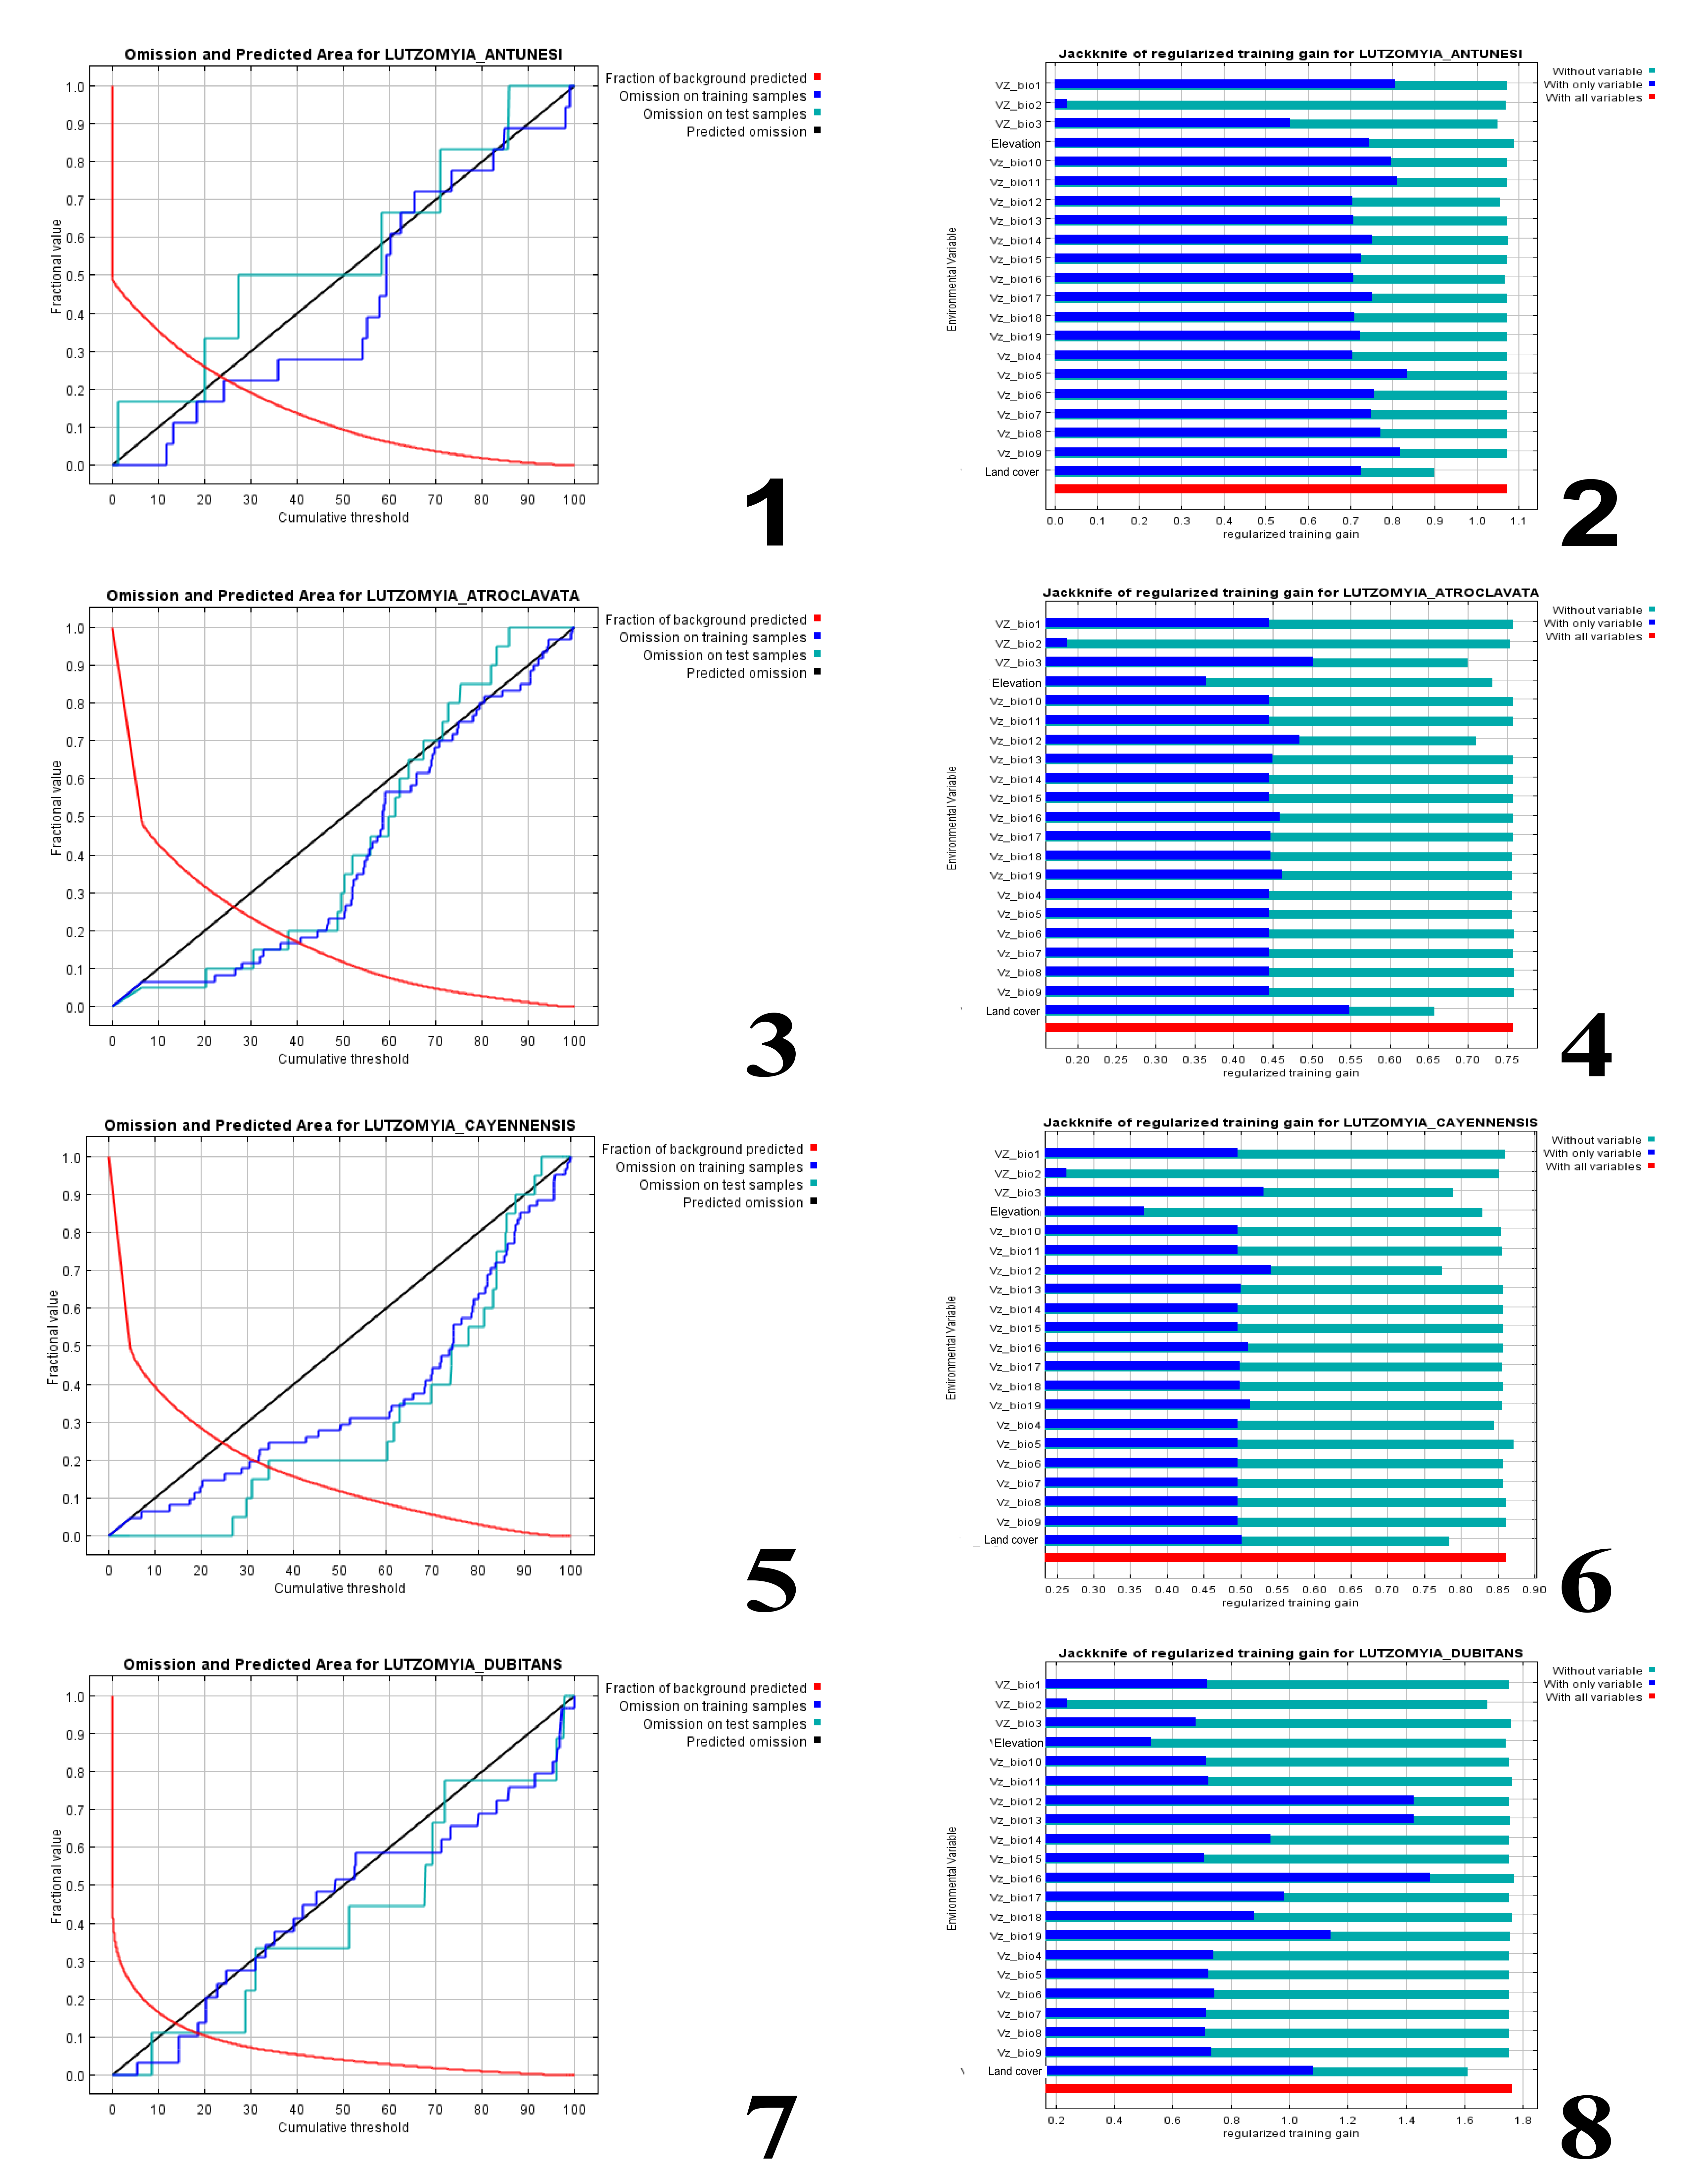


**Supplementary material**: Omission and predicted area and Jackknife regularized trained gain figures, for each *Lutzomyia* species: (9,10) *L. evansi*, (11,12) *L. gomezi*, (13,14) *L. lichyi* and (15,16) *L. longipalpis s.l.*


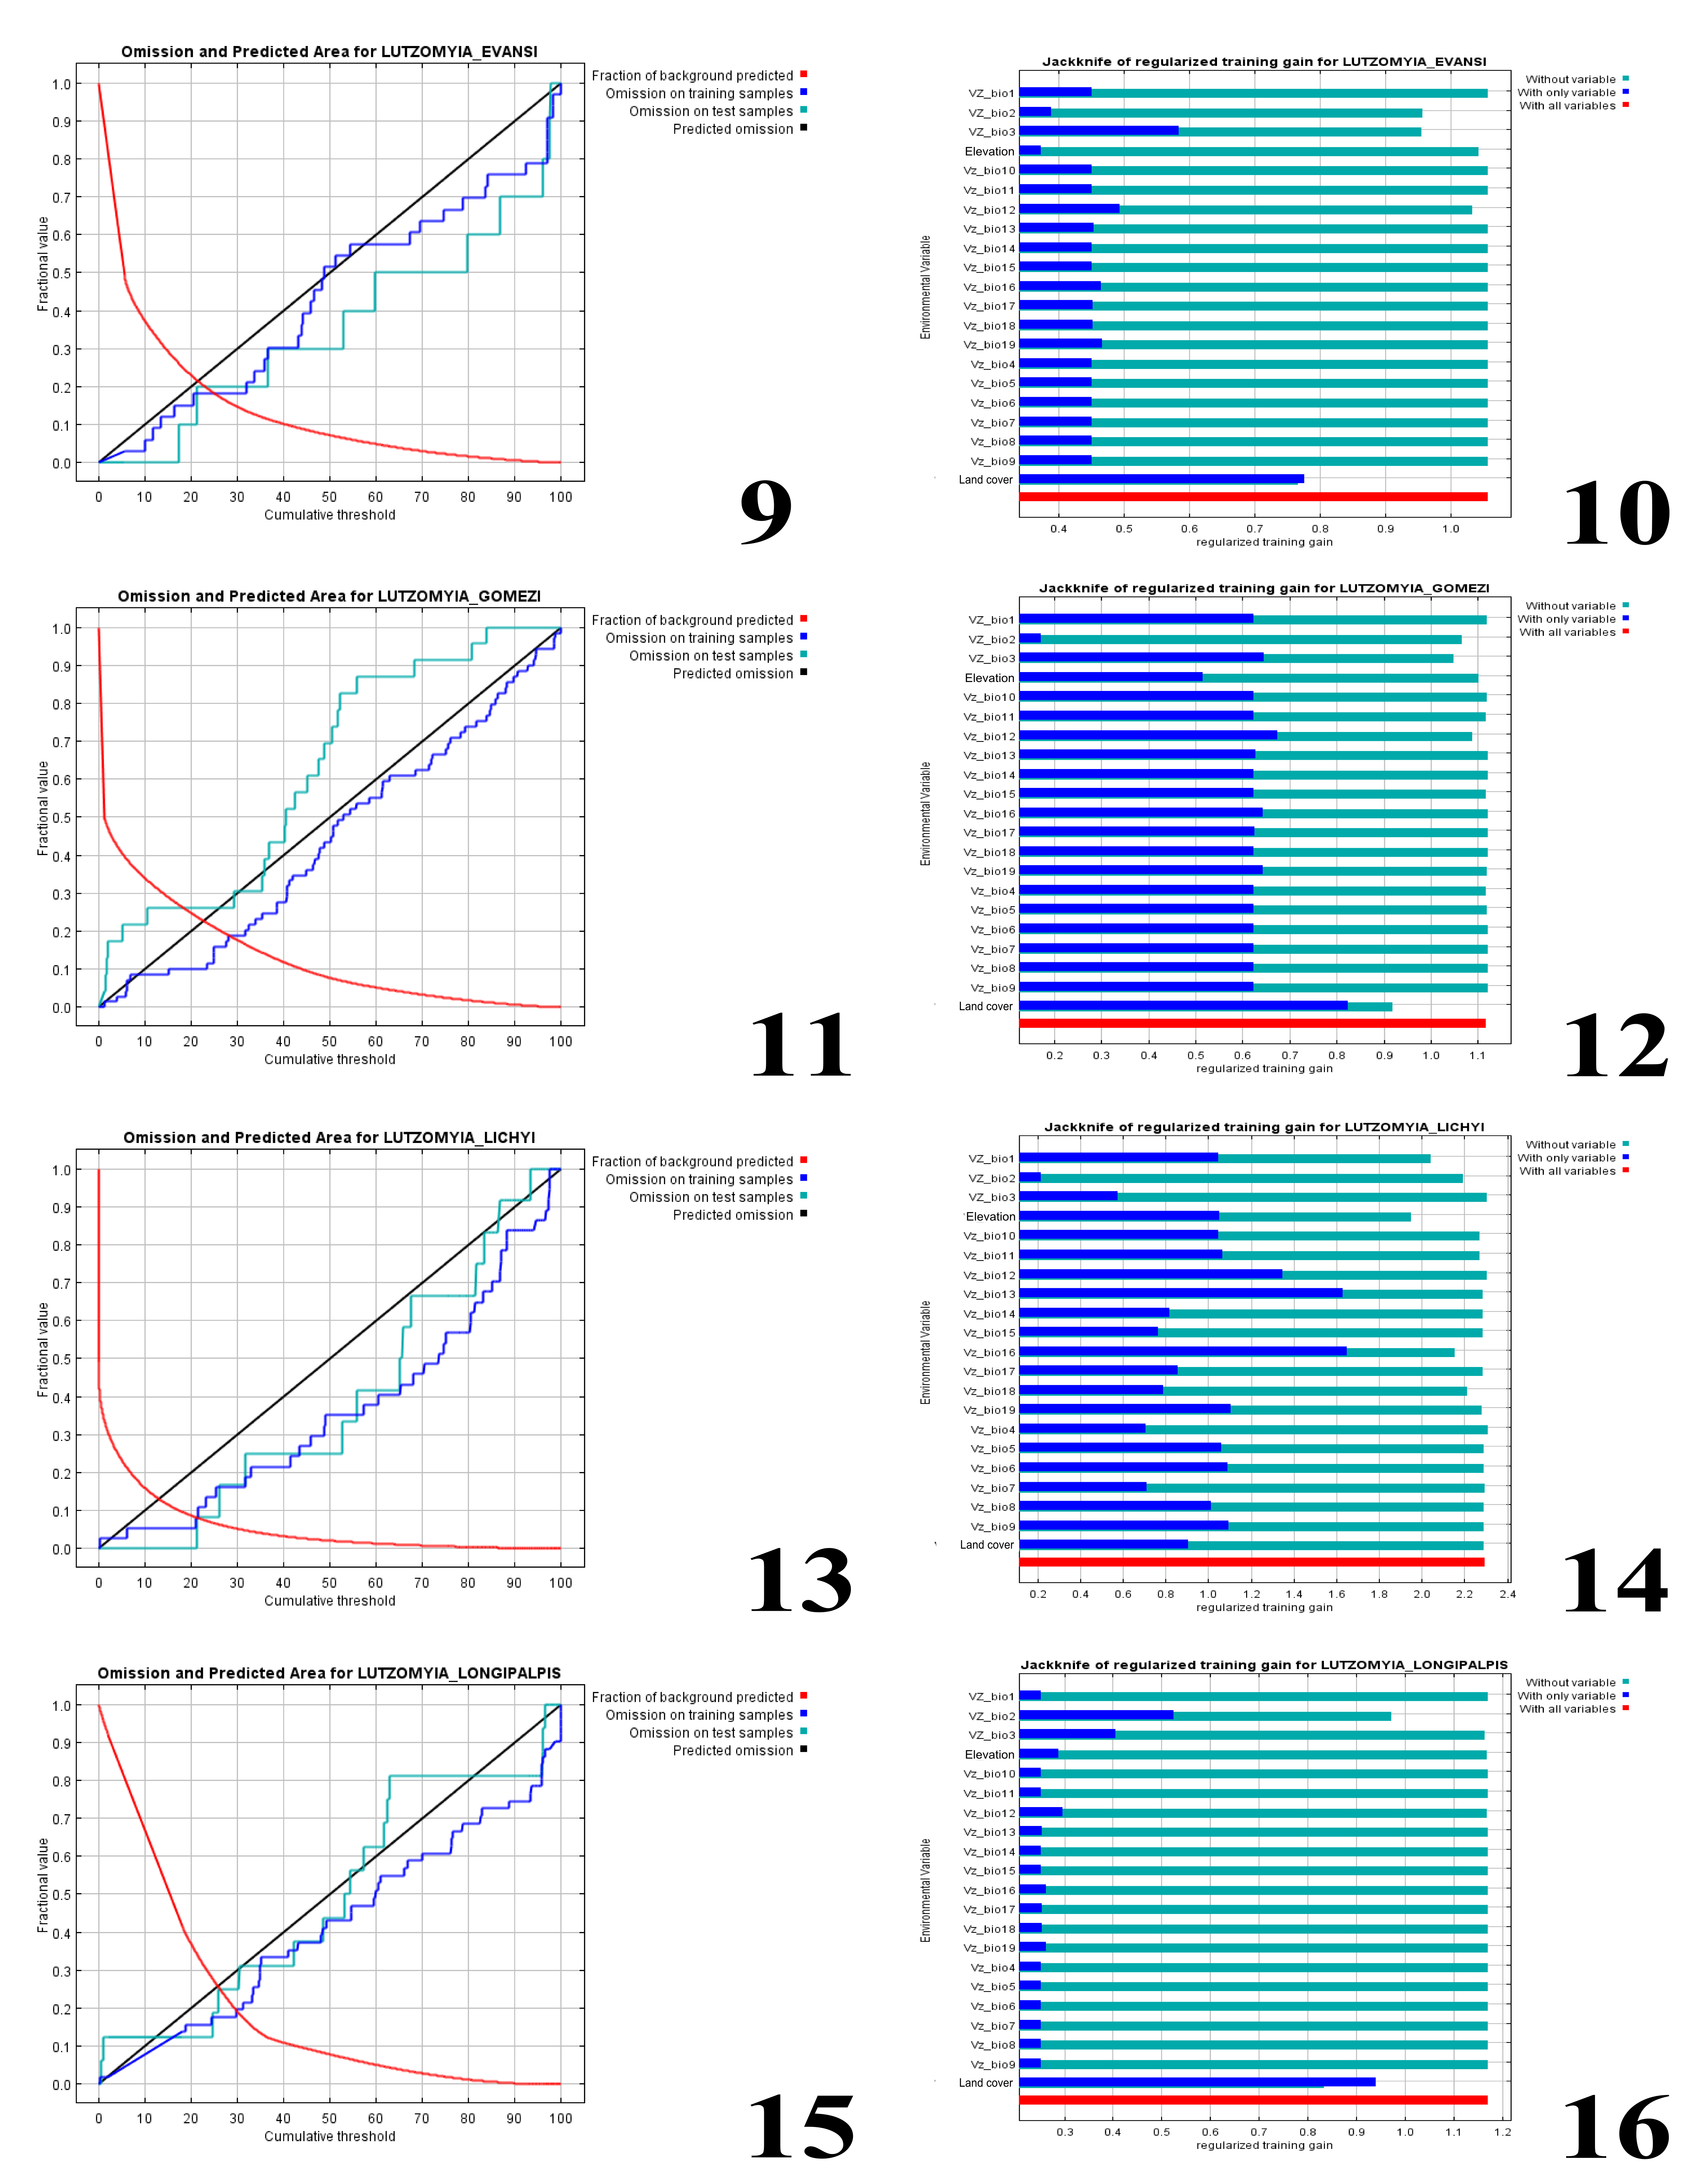


**Supplementary material**: Omission and predicted area and Jackknife regularized trained gain figures, for each *Lutzomyia* species: (17,18) *L. micropyga*, (19,20) *L. migonei*, (21,22) *L. nuneztovari* and (23,24) *L. olmeca bicolor.*


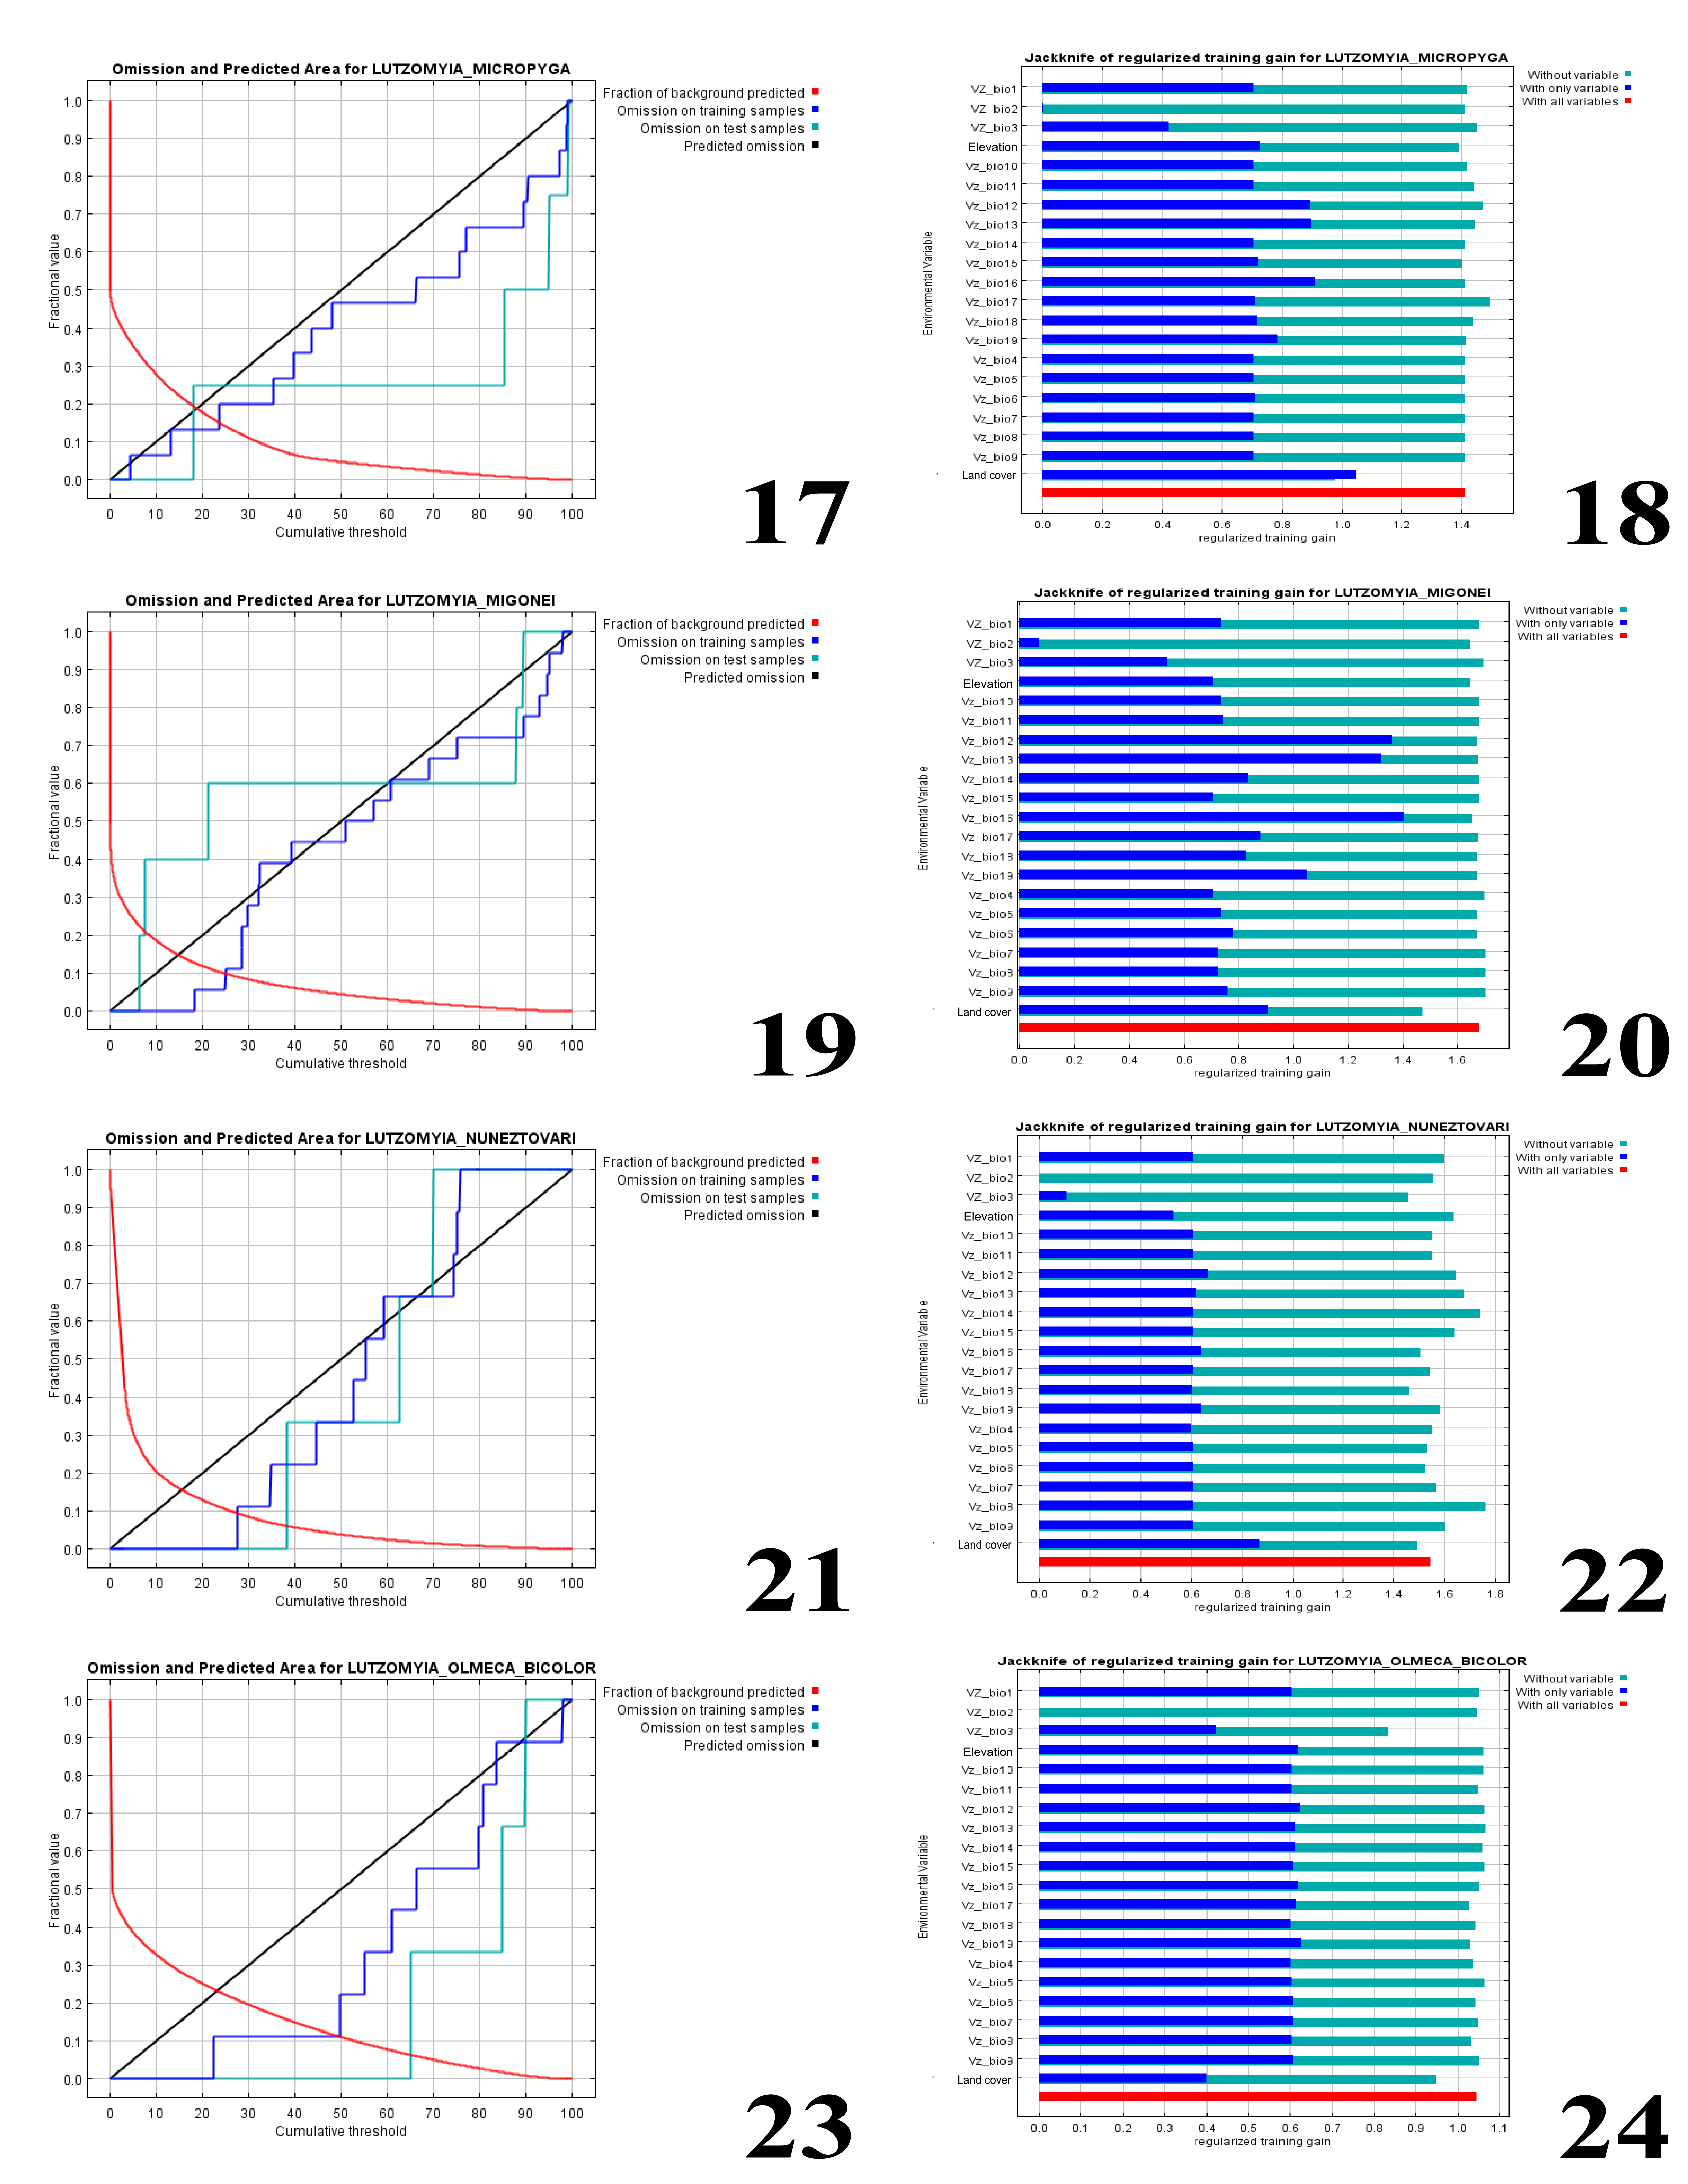


**Supplementary material**: Omission and predicted area and Jackknife regularized trained gain figures, for each *Lutzomyia* species: (25,26) *L. ovallesi*, (27,28) *L. panamensis* and (29,30) *L. punctigeniculata*.


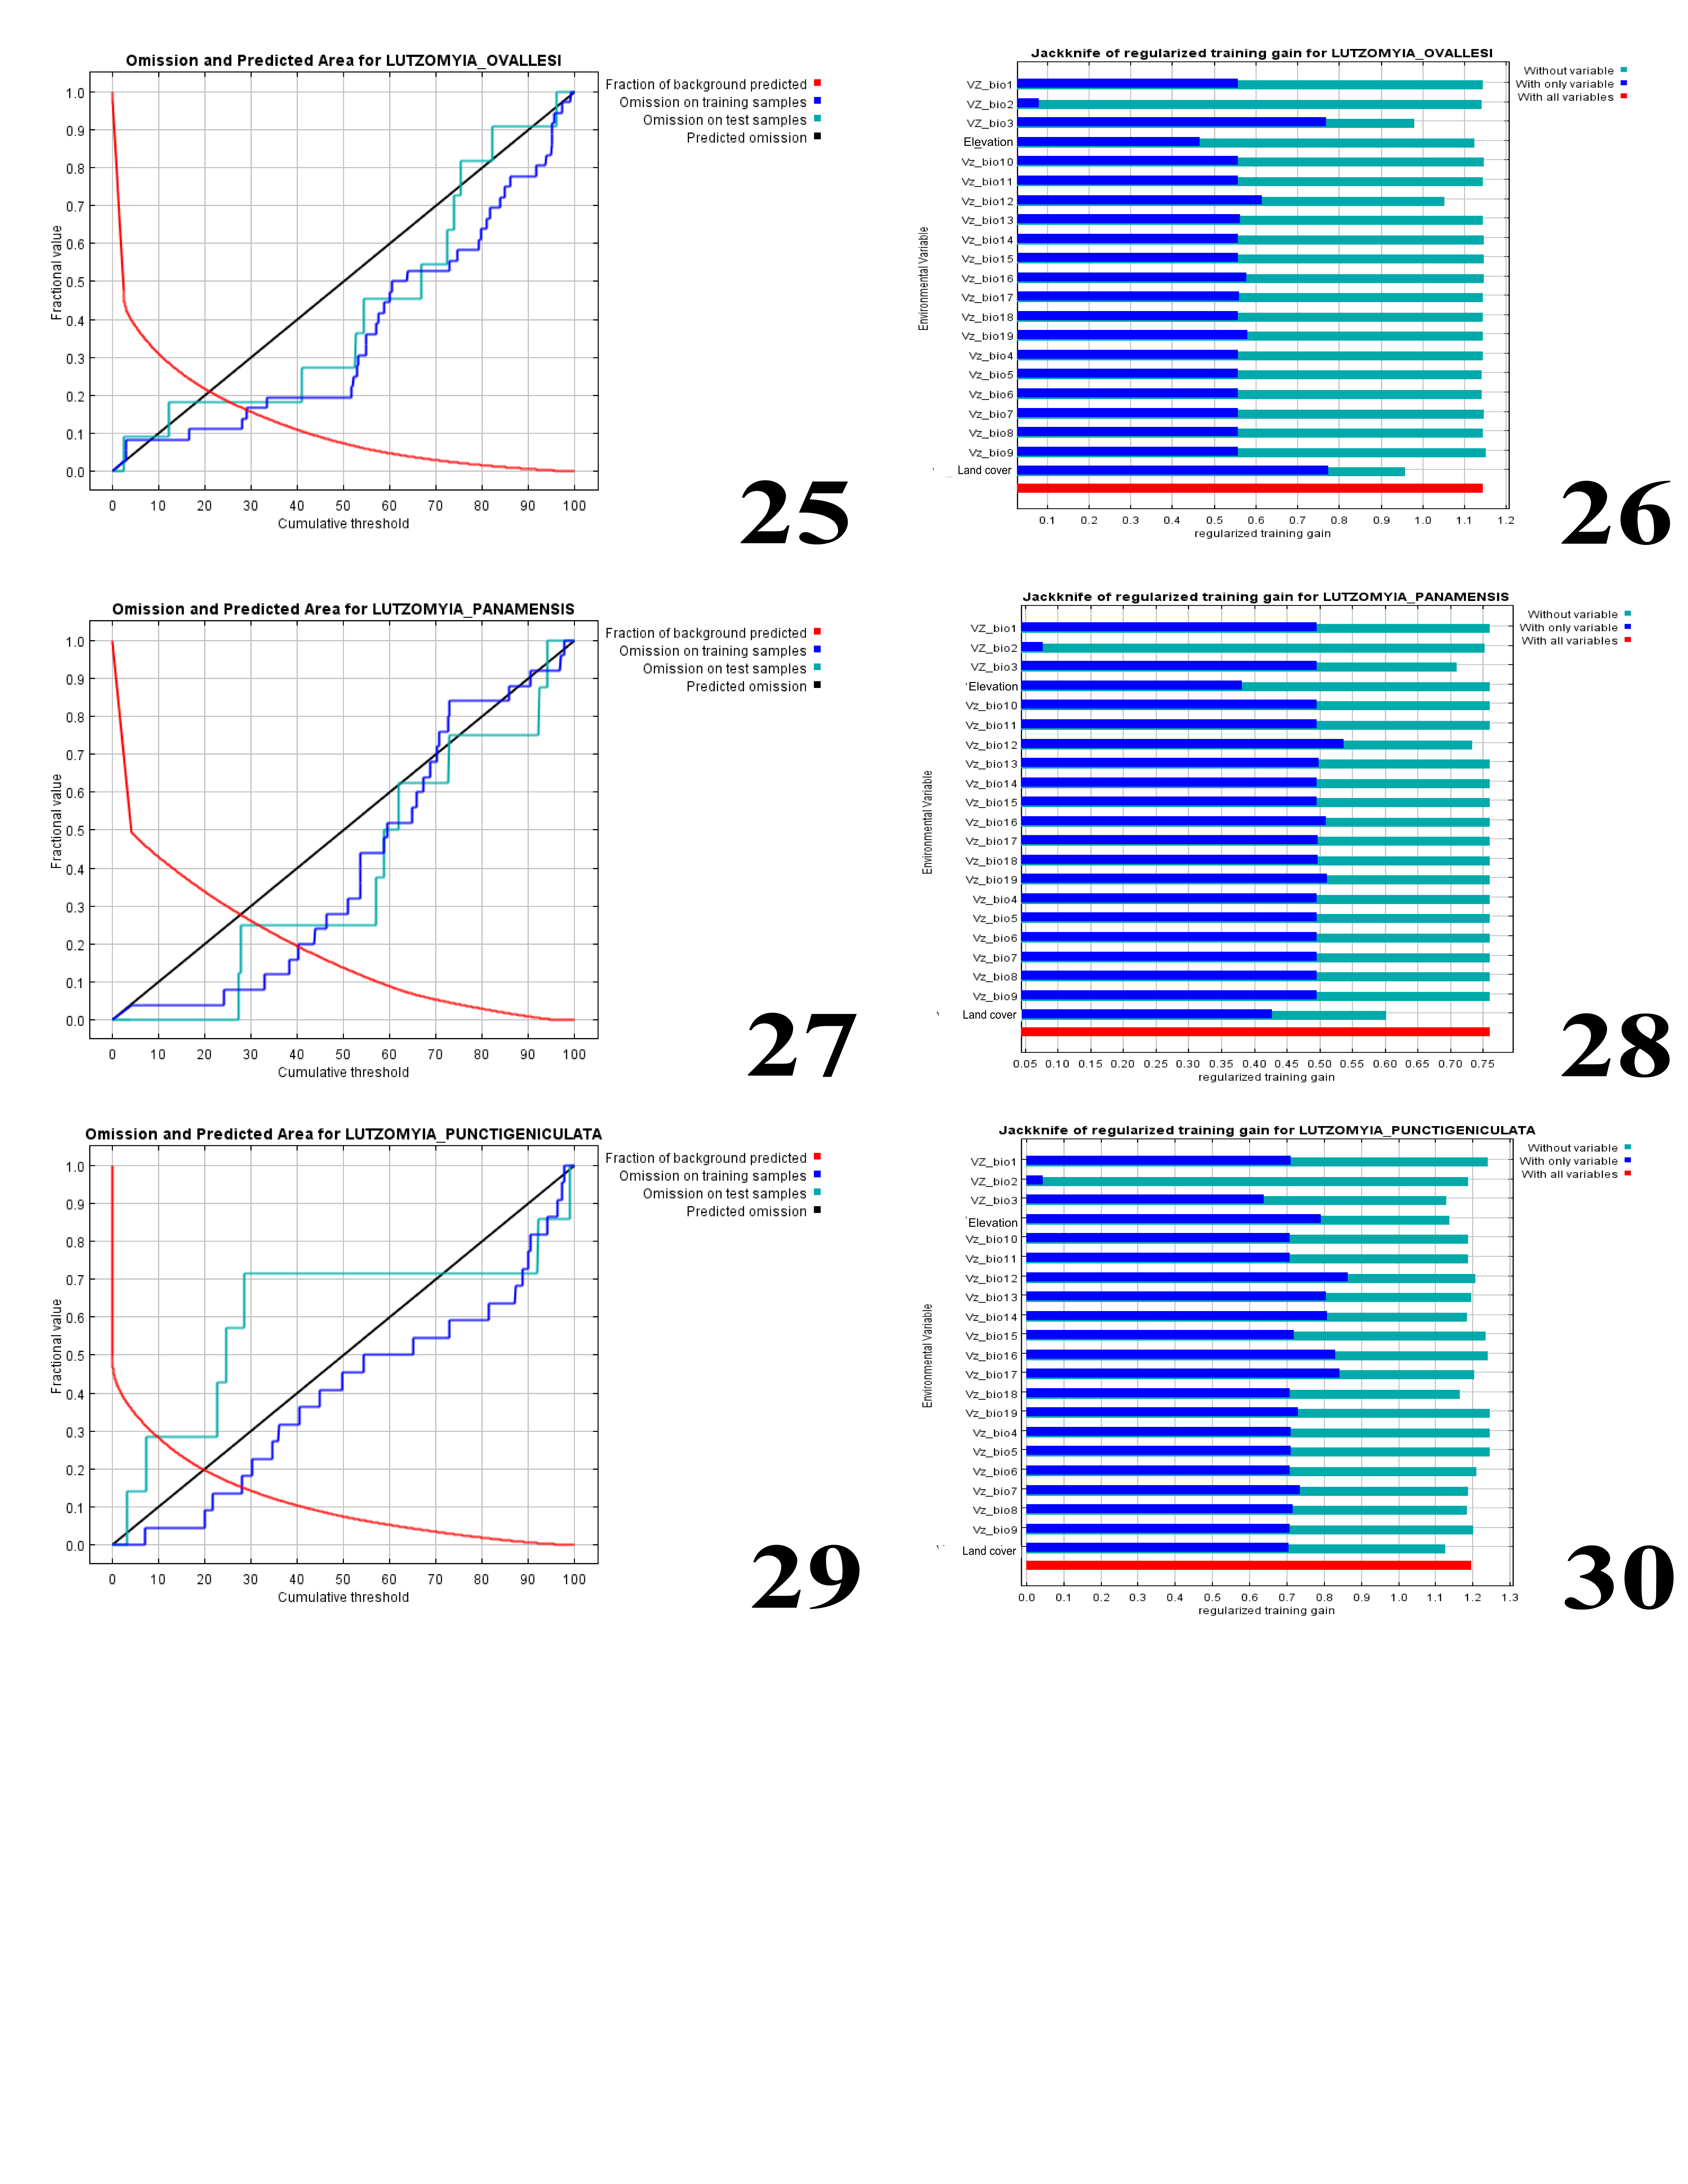

Supplement: f1 [file 108306.f1.doc]
